# Supplementary material
Source: publisher figshare collection journal article supplement (https://acs.figshare.com/ndownloader/files/3946456)
Supplement: Supplementary file 1 [file 3946456]

# Supporting Information

## Aerobic Oxidation of Formaldehyde Catalyzed by Polyvanadotungstates

*Weiwei Guo, Zhen Luo, Hongjin Lv, Craig L. Hill\**

Department of Chemistry, Emory University, 1515 Dickey Drive, Atlanta, Georgia, 30322, United States

### Table of Contents

**Figure S1.** Thermogravimetric analysis of (a)  $\text{PW}_9\text{V}_3$ , (b)  $\text{PW}_8\text{V}_4$  and (c)  $\text{PW}_6\text{V}_6$

**Figure S2.**  $^{31}\text{P}$  NMR of (a)  $\text{PW}_9\text{V}_3$ , (b)  $\text{PW}_8\text{V}_4$  and (c)  $\text{PW}_6\text{V}_6$  with respect to 85%  $\text{H}_3\text{PO}_4$  (0 ppm)

**Table S1.** Aerobic Oxidation of Formaldehyde Catalyzed by  $\text{PW}_8\text{V}_4$ , as a Function of Substrate and Catalyst Concentration

**Figure S3.** Time profile of formaldehyde consumption catalyzed by  $\text{PW}_9\text{V}_3$  under 1 atm oxygen (red squares) and under 1 atm of air (black diamonds) in DMA/ $\text{H}_2\text{O}$  (v/v = 20/1) at ambient temperature

**Figure S4.** Time profile of formaldehyde consumption catalyzed by  $\text{PW}_9\text{V}_3$  under 1 atm of air without additives (black diamonds), with addition of 0.6 mmol HCOOH (red squares) and with addition of 1.0  $\mu\text{mol}$  4-*t*-butylcatechol (green triangles); all reactions at ambient temperature

**Figure S5.**  $^1\text{H}$  NMR spectrum of 400  $\mu\text{L}$  of reaction solution using  $\text{PW}_9\text{V}_3$  as the catalyst under optimized conditions after 144 h followed by mixing with 400  $\mu\text{L}$  of deuterated chloroform

**Figure S6.** X-ray diffraction patterns of (a)  $\text{TiO}_2$ , (b) reduced Pt/ $\text{TiO}_2$ , (c) oxidized Pt/ $\text{TiO}_2$ , (d) Au/ $\text{TiO}_2$

**Figure S7.** FT-IR spectra of (a)  $\text{PW}_8\text{V}_4$ , (b)  $\text{PW}_6\text{V}_6$  and (c)  $\text{PW}_9\text{V}_3$  before (red) and after (blue) catalytic reactions

\*Email: chill@emory.edu

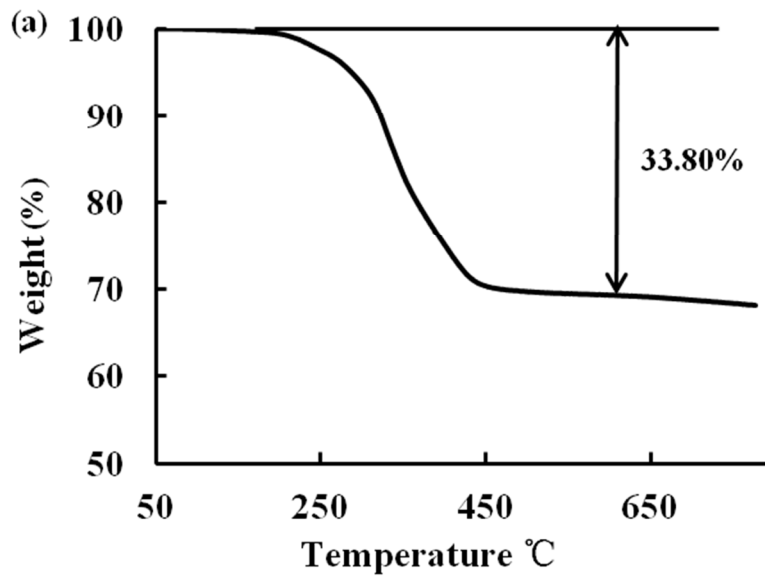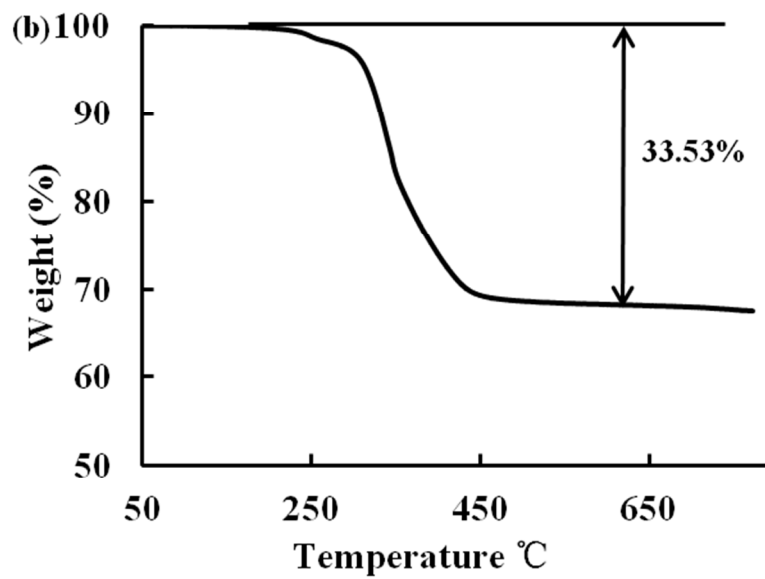

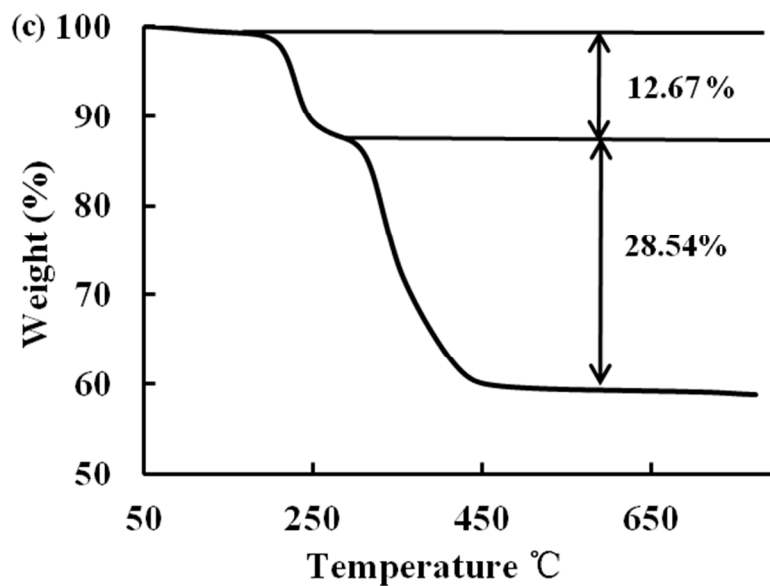

**Figure S1.** Thermogravimetric analysis of (a)  $PW_9V_3$ , (b)  $PW_8V_4$  and (c)  $PW_6V_6$

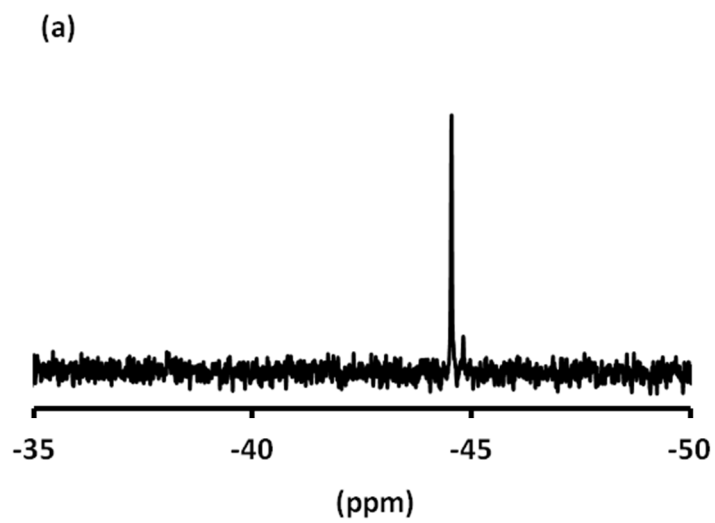

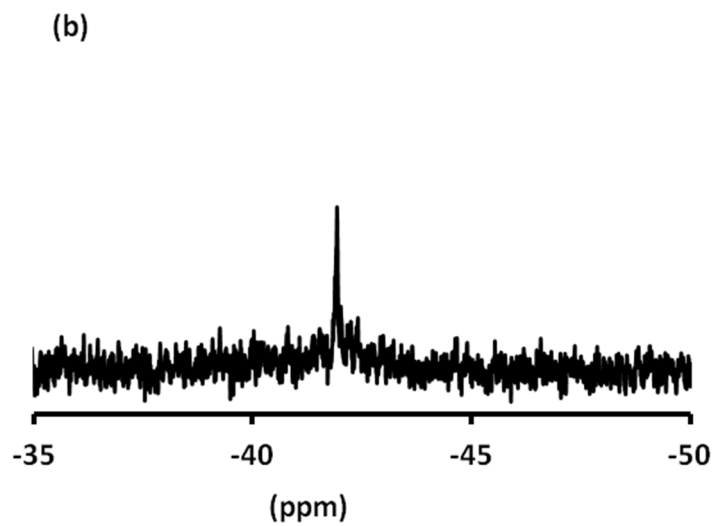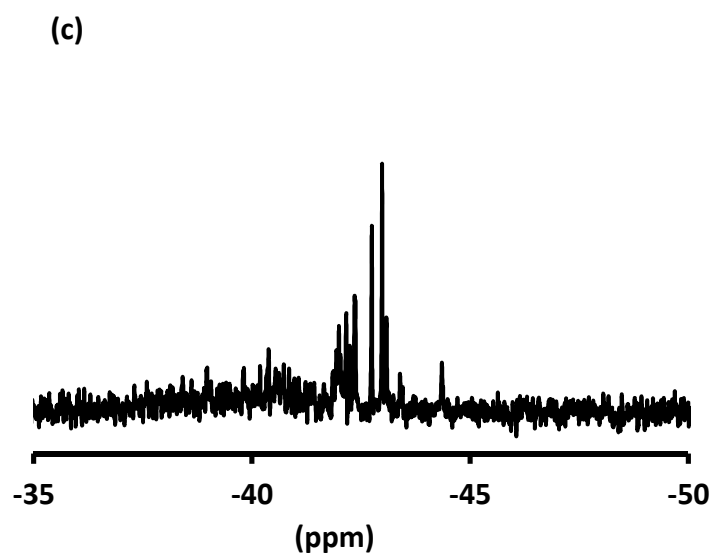

**Figure S2.**  $^{31}\text{P}$  NMR of (a)  $\text{PW}_9\text{V}_3$ , (b)  $\text{PW}_8\text{V}_4$  and (c)  $\text{PW}_6\text{V}_6$  with respect to 85%  $\text{H}_3\text{PO}_4$  (0 ppm)

**Table S1.** Aerobic Oxidation of Formaldehyde Catalyzed by  $\text{PW}_8\text{V}_4$ , as a Function of Substrate and Catalyst Concentration<sup>a</sup>

| Entry | $[\text{PW}_8\text{V}_4]$ | Initial $[\text{CH}_2\text{O}]$ | $\text{CH}_2\text{O}$ conversion (%) <sup>b</sup> | TON <sup>c</sup> |
|-------|---------------------------|---------------------------------|---------------------------------------------------|------------------|
| 1     | 3.8 mM                    | 0.065 M                         | 12                                                | 2                |
| 2     | 3.8 mM                    | 0.130 M                         | 21                                                | 7                |
| 3     | 3.8 mM                    | 0.260 M                         | 31                                                | 21               |
| 4     | 3.8 mM                    | 0.520 M                         | 35                                                | 47               |
| 5     | 7.6 mM                    | 0.520 M                         | 45                                                | 31               |
| 6     | 11.4 mM                   | 0.520 M                         | 48                                                | 22               |
| 7     | 15.3 mM                   | 0.520 M                         | 47                                                | 16               |
| 8     | 19.1 mM                   | 0.520 M                         | 45                                                | 12               |

<sup>a</sup> Reaction Conditions: concentration of formaldehyde  $[\text{CH}_2\text{O}] = 0.065 \text{ M} - 0.52 \text{ M}$ , concentration of catalyst  $[\text{PW}_8\text{V}_4] = 3.8 \text{ mM} - 19.1 \text{ mM}$ , 1 atm of air, 2 mL of solvent, ambient temperature, 144 h. <sup>b</sup>  $\text{CH}_2\text{O}$  conversion (%) = moles of  $\text{CH}_2\text{O}$  consumed/moles of initial  $\text{CH}_2\text{O}$ . <sup>c</sup> TON = moles of formaldehyde consumed/moles of catalyst.

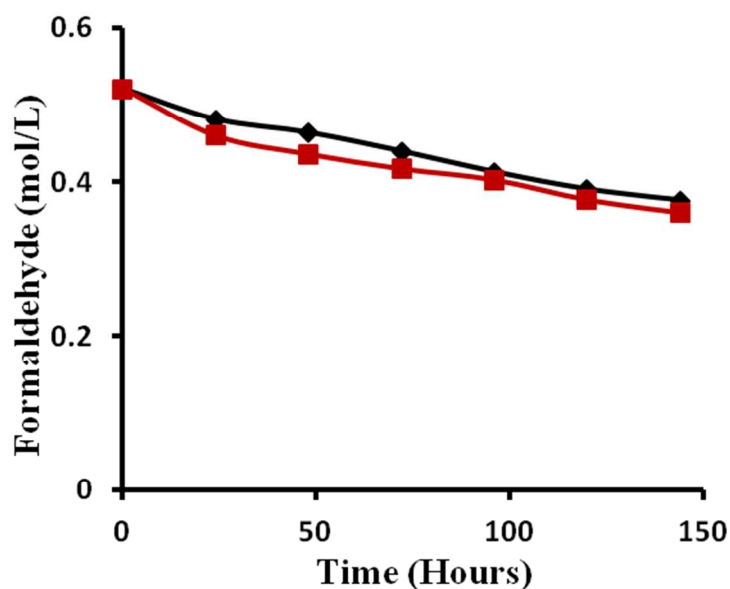

**Figure S3.** Time profile of formaldehyde consumption catalyzed by  $\text{PW}_9\text{V}_3$  under 1 atm oxygen (red squares) and under 1 atm of air (black diamonds) in DMA/ $\text{H}_2\text{O}$  (v/v = 20/1) at ambient temperature

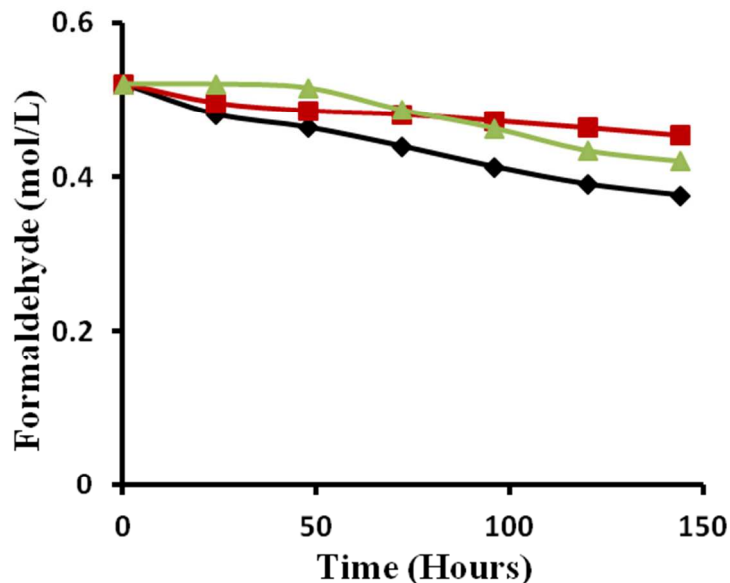

**Figure S4.** Time profile of formaldehyde consumption catalyzed by  $\text{PW}_9\text{V}_3$  under 1 atm of air without additives (black diamonds), with addition of 0.6 mmol  $\text{HCOOH}$  (red squares) and with addition of 1.0  $\mu\text{mol}$  4-*t*-butylcatechol (green triangles); all reactions at ambient temperature

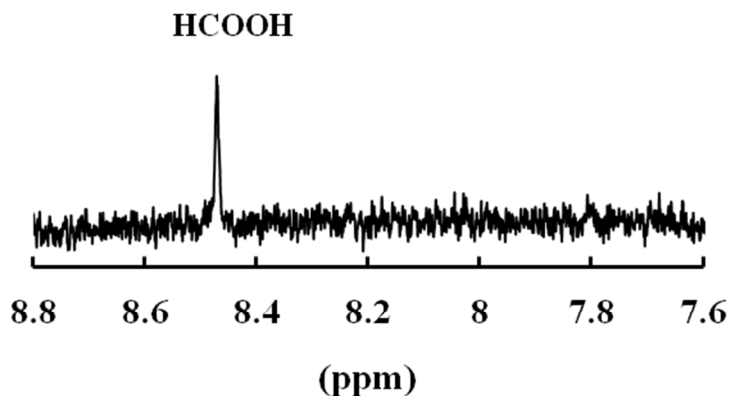

**Figure S5.**  $^1\text{H}$  NMR spectrum of 100  $\mu\text{L}$  of reaction solution using  $\text{PW}_9\text{V}_3$  as the catalyst under optimized conditions after 144 h followed by mixing with 100  $\mu\text{L}$  of deuterated chloroform

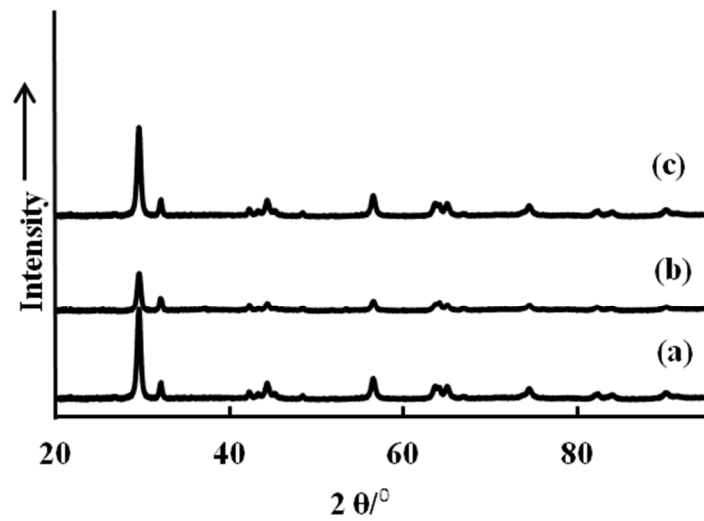

**Figure S6.** X-ray diffraction patterns of (a) TiO<sub>2</sub>, (b) reduced Pt/TiO<sub>2</sub>, (c) Au/TiO<sub>2</sub>

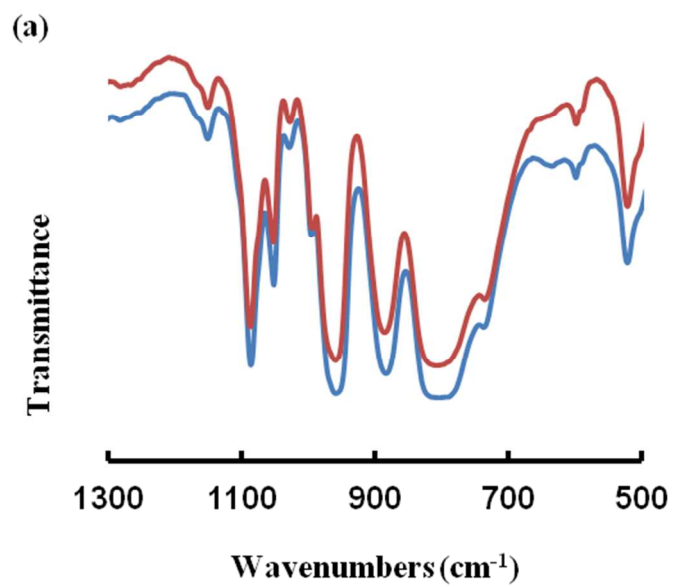

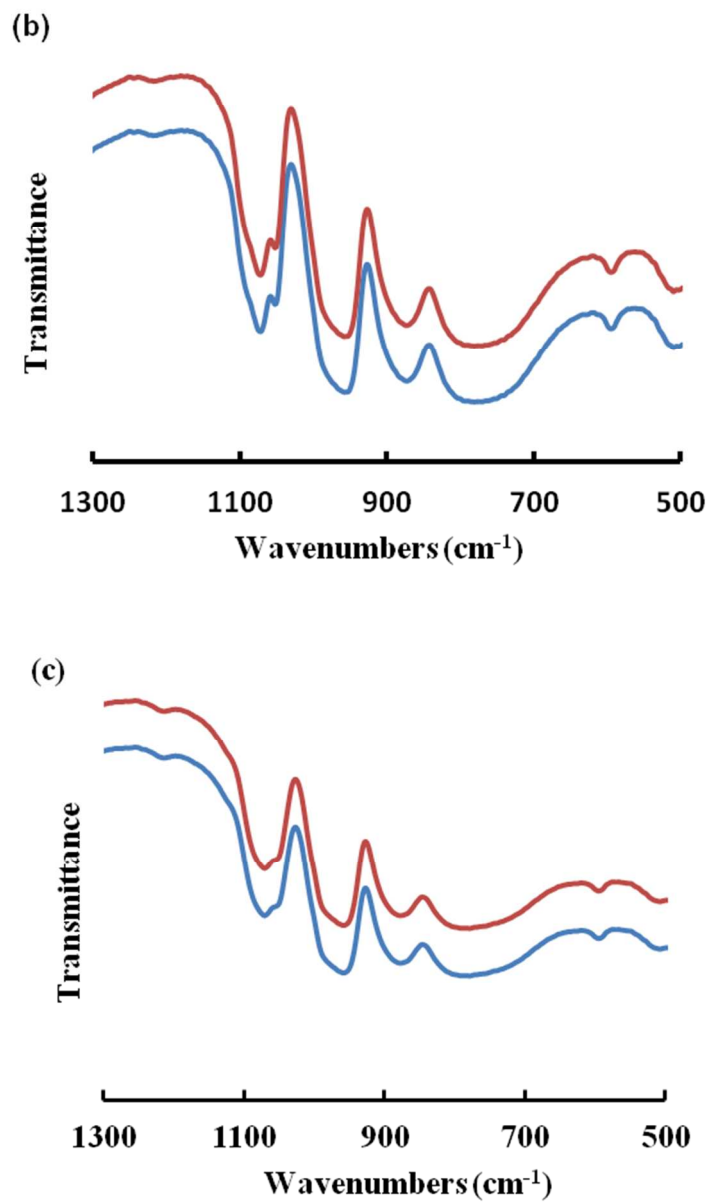

**Figure S7.** FT-IR spectra of (a) PW<sub>9</sub>V<sub>3</sub>, (b) PW<sub>8</sub>V<sub>4</sub> and (c) PW<sub>6</sub>V<sub>6</sub> before (red) and after (blue) catalytic reactions
